# Supplementary material for: Two quasi-spherical molecules [1,4-diazabicyclo(3.2.2)nonane]X (X = ClO4, ReO4) exhibit switchable phase transition, dielectric and second-harmonic-generation properties
Source: Royal Society of Chemistry journal article supplement (doi:10.1039/d2nj02531k), 2022-01-01
Supplement: d2nj02531k1.pdf [file d2nj02531k1.pdf]

## ESI

Two quasi-spherical molecules [1,4-diazabicyclo[3.2.2]nonane]X (X = ClO<sub>4</sub>, ReO<sub>4</sub>) exhibit switchable phase transition, dielectric and second harmonic generation properties

Xiuli You,<sup>a</sup> Wenjun Rao,<sup>b</sup> Keke Han,<sup>b</sup> Lingyu Wang,<sup>b</sup> Mengxia Zhang,<sup>b</sup> Zhenhong Wei<sup>\*b</sup>

<sup>a</sup> Jiangxi Key Laboratory of Organic Chemistry, Jiangxi Science and Technology Normal University, Nanchang City, 330013, People's Republic of China

<sup>b</sup> School of Chemistry and Chemical Engineering, Nanchang University, Nanchang City, 330031, People's Republic of China

Correspondence email: weizh@ncu.edu.cn

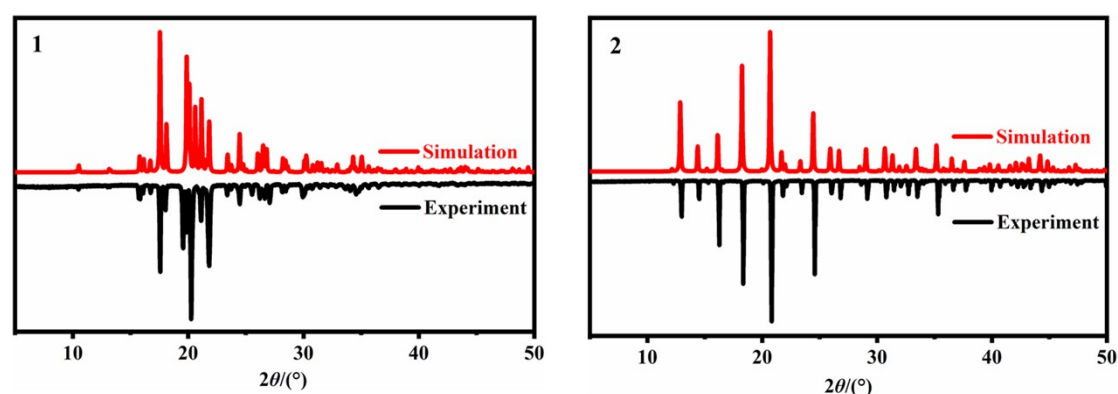

**Fig. S1** The powder X-ray diffraction patterns of compounds **1** and **2** with the simulated one in red and the experimental one in black.

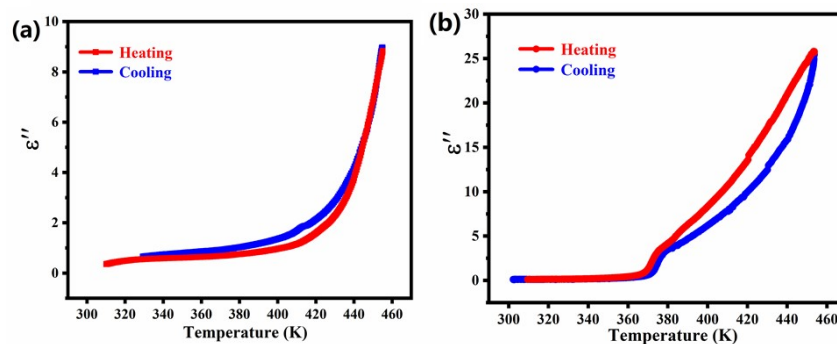

**Fig. S2** Temperature dependences of the imaginary part of ( $\epsilon''$ ) of the dielectric permittivity of **1** at 1 MHz upon heating and cooling.

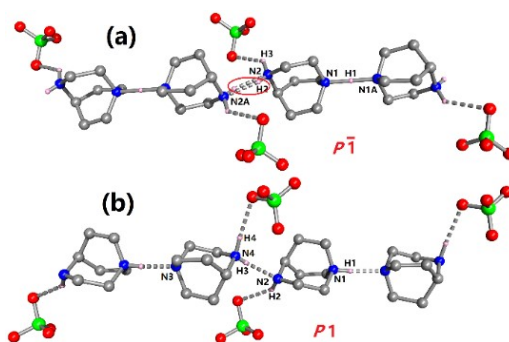

**Fig. S3** The crystal structure of **1** solved in (a)  $P\bar{1}$  and (b)  $P1$  space groups at LTP.

**Tab. S1.** Crystal data and structure refinements for **1** at 298 K and 438 K.

|                |                     |              |
|----------------|---------------------|--------------|
| Formula        | $C_7H_{15}ClN_2O_4$ |              |
| Temperature    | 298 K               | 438 K        |
| Formula Mass   | 226.66              | 778.6        |
| Crystal system | triclinic           | cubic        |
| Space group    | $P1$                | $Pm\bar{3}m$ |
| $a$ (Å)        | 6.7331(3)           | 6.3959(10)   |
| $b$ (Å)        | 8.6522(3)           | 6.3959(10)   |

|                                         |                                       |                                      |
|-----------------------------------------|---------------------------------------|--------------------------------------|
| $c$ (Å)                                 | 8.8761(3)                             | 6.3959(10)                           |
| $V$ (Å) <sup>3</sup>                    | 500.46(3)                             | 261.64(12)                           |
| $Z$                                     | 2                                     | 1                                    |
| $D_{\text{calc}}$ (g·cm <sup>-3</sup> ) | 1.504                                 | 4.942                                |
| $F$ (000)                               | 240                                   | 388.9                                |
| $\theta_{\text{max}}$                   | 24.99                                 | 31.41                                |
| $\mu$ (Mo Ka,mm <sup>-1</sup> )         | 0.374                                 | 0.514                                |
| <i>Flack</i> parameter                  | 0.27(13)                              |                                      |
| Total no. of reflns.                    | 5249                                  | 1524                                 |
| No. of unique reflns.                   | 2899[ $R_{\text{(int)}} =$<br>0.0218] | 119[ $R_{\text{(int)}} =$<br>0.3041] |
| No. of variables                        | 269                                   | 18                                   |
| $R_1, wR_2$ (obsd data)                 | 0.0630, 0.1656                        | 0.2769, 0.5924                       |
| $R_1, wR_2$ (all data)                  | 0.0718, 0.1756                        | 0.4057, 0.6276                       |
| GOF, S                                  | 1.257                                 | 2.523                                |
| Max./min. peak (e.<br>Å <sup>-3</sup> ) | 0.356, -0.276                         | 1.78, -1.69                          |

**Tab. S2** Hydrogen bond lengths [Å] and angles [°] of **1** at 298 K.

| D-H...A                 | D-H [Å] | H...A[Å] | D...A[Å] | D-H...A[°] |
|-------------------------|---------|----------|----------|------------|
| N1-H1...N3 <sup>1</sup> | 0.91(2) | 1.82(2)  | 2.726(3) | 176.1(16)  |

|                         |           |           |          |           |
|-------------------------|-----------|-----------|----------|-----------|
| N2-H2...O2              | 0.92(3)   | 2.60(4)   | 3.296(4) | 133(3)    |
| N2-H2...O3              | 0.92(3)   | 2.29(3)   | 3.059(3) | 141(3)    |
| N4-H4...O7 <sup>2</sup> | 0.997(17) | 2.222(17) | 3.217(5) | 176.9(14) |
| N4-H4...O8 <sup>2</sup> | 0.997(17) | 2.455(15) | 3.101(3) | 122.0(12) |
| N4-H3...N2 <sup>3</sup> | 0.69(3)   | 2.09(3)   | 2.772(3) | 170(3)    |

For **1** at 298K: <sup>1</sup>*x*, *y*, 1+*z*; <sup>2</sup>-1+*x*, -1+*y*, *z*; <sup>3</sup>*x*, -1+*y*, *z*

**Tab. S3.** Crystal data and structure refinements for **2** at 297 K and 413 K.

|                                                |                                                                 |              |
|------------------------------------------------|-----------------------------------------------------------------|--------------|
| Formula                                        | C <sub>7</sub> H <sub>15</sub> N <sub>2</sub> O <sub>4</sub> Re |              |
| Temperature                                    | 297 K                                                           | 413 K        |
| Crystal system                                 | orthorhombic                                                    | tetragonal   |
| Space group                                    | <i>Pccn</i>                                                     | <i>P-42m</i> |
| <i>a</i> (Å)                                   | 10.9820(4)                                                      | 6.8907(5)    |
| <i>b</i> (Å)                                   | 13.7336(5)                                                      | 6.8907(5)    |
| <i>c</i> (Å)                                   | 13.7637(6)                                                      | 5.8523(10)   |
| <i>V</i> (Å) <sup>3</sup>                      | 2075.87(14)                                                     | 277.88(6)    |
| <i>Z</i>                                       | 8                                                               | 1            |
| <i>D</i> <sub>calc</sub> (g·cm <sup>-3</sup> ) | 2.415                                                           | 2.500        |
| <i>F</i> (000)                                 | 1424                                                            | 191          |
| <i>θ</i> <sub>max</sub>                        | 31.74                                                           | 31.46        |
| <i>μ</i> (Mo Ka,mm <sup>-1</sup> )             | 11.7                                                            | 10.937       |

|                                      |                                      |                                     |
|--------------------------------------|--------------------------------------|-------------------------------------|
| Total no. of reflns.                 | 13007                                | 1960                                |
| No. of unique reflns.                | 1834 [ $R_{(\text{int})} = 0.0343$ ] | 449 [ $R_{(\text{int})} = 0.0234$ ] |
| No. of variables                     | 136                                  | 15                                  |
| $R_1, wR_2$ (obsd data)              | 0.0191, 0.0599                       | 0.0425, 0.1033                      |
| $R_1, wR_2$ (all data)               | 0.0270, 0.0652                       | 0.0914, 0.1157                      |
| GOF, S                               | 1.006                                | 1.176                               |
| Max./min. peak (e. Å <sup>-3</sup> ) | 0.704, -0.466                        | 0.368, -0.548                       |

**Tab. S4** Hydrogen bond lengths [Å] and angles [°] of **2** at 297 K.

| D-H...A                 | D-H [Å] | H...A[Å] | D...A[Å] | D-H...A[°] |
|-------------------------|---------|----------|----------|------------|
| N2-H1...N1 <sup>1</sup> | 1.04(4) | 1.80(4)  | 2.831(3) | 178(5)     |
| N2-H2...O1              | 0.92(4) | 1.99(4)  | 2.876(4) | 161(3)     |

For **2** at 297K:  $^1-1/2+x, -y, 1/2-z$ .
